# 1   **Inversion frequencies and phenotypic effects are** 2   **modulated by the environment**

3  
4   **Emma Berdan<sup>1</sup>, Hanna Rosenquist<sup>2</sup>, Keith Larson<sup>3</sup>, Maren Wellenreuther<sup>4,\*</sup>**

5  
6   <sup>1</sup>Department of Marine Sciences, University of Gothenburg, Gothenburg,  
7   Sweden

8   <sup>2</sup> MEMEG, Ecology Building, Lund University, Lund, Sweden

9   <sup>3</sup>Department of Ecology and Environmental Sciences, Climate Impacts Research  
10   Centre, Umeå University, Umeå, Sweden

11   <sup>4</sup>The New Zealand Institute for Plant & Food Research Ltd, Auckland, New  
12   Zealand

13  
14   \*Corresponding author: Maren Wellenreuther, The New Zealand Institute for  
15   Plant & Food Research Limited, Box 5114, Port Nelson, Nelson 7043, New  
16   Zealand.

17   tel.: +64 3 989 7658; fax: +64 3 546 7049; e-mail:

18   [maren.wellenreuther@plantandfood.co.nz](mailto:maren.wellenreuther@plantandfood.co.nz)

19   **Running title:** karyotype x environment effects

20   **Word count:** 4,511

## Abstract

Understanding how environmental variation drives phenotypic diversification within species is a major objective in evolutionary biology. The seaweed fly *Coelopa frigida* provides an excellent model for the study of genetically driven phenotypes because it carries an  $\alpha/\beta$  inversion polymorphism that affects body size. *Coelopa frigida* inhabits highly variable beds of decomposing seaweed on the coast in Scandinavia thus providing a suitable test ground to investigate the genetic effects of substrate on both the frequency of the inversion (directional selection) and on the phenotype (genotype x environment effects). Here we use a reciprocal transplant experiment to test the effect of the  $\alpha/\beta$  inversion on body size traits and development time across four suitable natural breeding substrates from the clinal distribution. We show that while development time is unaffected by GxE effects, both the frequency of the inversion and the relative phenotypic effects of the inversion on body size differ between population x substrate combinations. This indicates that the environment modulates the fitness as well as the phenotypic effects of the inversion karyotypes. It further suggests that the inversion may have accumulated qualitatively different mutations in different populations that interact with the environment. Together our results are consistent with the idea that the inversion in *C. frigida* likely evolves via a combination of local mutation, GxE effects, and differential fitness of inversion karyotypes in heterogeneous environments.

**Keywords:** *Coelopa frigida*, inversion polymorphism, adaptation, GxE interactions, frequency effects

## Introduction

One of the central goals of evolutionary biology is to understand how organisms cope with environmental heterogeneity (Savolainen *et al*, 2013). Phenotypic plasticity can solve this problem but the phenotypic response to variation in an environmental variable (i.e. phenotypic plasticity) may vary among species as well as among genotypes of the same species. This is commonly referred to as a Genotype-by-Environment interaction (GxE, Falconer, 1990; Lynch and Walsh, 1998; Via and Lande, 1985). Abundant experimental data and theoretical work now provide strong support for the idea that the relative performance of different genotypes across environmental gradients may be involved in the maintenance of phenotypic plasticity and genetic variation as well as the evolution of fitness related phenotypes (Carreira *et al*, 2006; Ungerer *et al*, 2003).

The study of environmental heterogeneity has been championed by work on geographic patterns along clines, with classic examples coming from genetic clines in flies almost a century ago (Dobzhansky, 1948; Sturtevant, 1921). Other examples include the genetic underpinnings of traits involved in adaptation to high altitude (Storz, 2002) and pigmentation (Hoekstra and Coyne, 2007). Clines hold a large attraction as natural Darwinian laboratories because they allow researchers to quantify the gradual effects of changing environments on

genotype, phenotype, and the interaction between them (Endler, 1977). These studies have shown that while many environmental tolerance traits that vary clinally are quantitative and polygenic (Wellenreuther and Hansson, 2016), they can also be located within chromosomal segments that segregate as a single locus (Tigano and Friesen, 2016). If environmentally adaptive variants are chromosomally linked, either because they are found on chromosomal inversions or are in areas of low recombination, their selective coefficients act in an additive manner and they may be less likely to be lost via genetic drift and more likely to contribute to rapid adaptation (Kirkpatrick and Barton, 2006). In the extreme case, complex adaptations may be accomplished through the fixation of linked sets of adaptive variants (Yeaman, 2013), often called supergenes, a case in which polygenic adaptation may be more accurately modeled with single-locus models (Schwander *et al*, 2014). Good examples for such single-locus supergene adaptations come from *Drosophila melanogaster* where inversion polymorphisms produce latitudinally varying phenotypes for traits including heat and cold tolerance and body size (Reinhardt *et al*, 2014; Schrider *et al*, 2016). Chromosomal inversion polymorphisms are being identified at a fast rate from an increasing number of populations of organisms, e.g. insects, plants, bacteria and humans, and are commonly linked to trait and fitness variation (Hoffmann and Rieseberg, 2008; Kirkpatrick and Barton, 2006). Inversions are particularly common in flies, and an intriguing mystery is why there are huge differences in levels of polymorphism and rates of fixation for inversions between closely related species and even between chromosomes in *Drosophila* spp. (Kirkpatrick,

2010). The seaweed fly *Coelopa frigida* (family Coelopidae) and its sister species *C. nebulorum* have a large chromosomal  $\alpha/\beta$  inversion polymorphism on chromosome I encompassing about 10% of the genome and containing ~100 genes (Aziz, 1975). The inversion polymorphism is known to affect a wide range of life history and reproductive traits, such as development time (Day and Buckley, 1980), body size (Butlin *et al*, 1982a), longevity and female fecundity (Butlin and Day, 1984a; Butlin *et al*, 1982c), female resistance to male mating attempts (Gilburn and Day, 1994; Gilburn *et al*, 1992) and also male's ability to overcome female resistance (Butlin *et al*, 1982a).

The most striking of these phenotypic traits is a three-fold size difference in males: male homokaryotypes for the inversion type  $\alpha$  are much larger (~9mm) than  $\beta$ - homokaryotypes (~3mm), whereas the heterokaryotype  $\alpha\beta$  is intermediate in size (~6mm) (Wellenreuther pers. obs., Butlin and Day, 1984b). Female size is not significantly affected by karyotype (Butlin and Day, 1984b). Maintenance of the polymorphism is secured by strong heterosis (Collins, 1978), since  $\alpha\beta$ -heterokaryotypes have higher fitness than either homokaryotype (Butlin and Day, 1984a; Butlin and Day, 1989). The heterokaryotype  $\alpha\beta$  has a higher viability during development than either homokaryotype, both in experiments (Butlin and Day, 1984a; Leggett *et al*, 1996) and in the field, as indicated by heterokaryotype excess (Butlin *et al*, 1982c; Day *et al*, 1983; Day *et al*, 1982b; Gilburn and Day, 1994). Heterokaryotype excess increases under interspecific competition with the congener *C. pilipes* and under intense intraspecific competition (Butlin and Day, 1984a; Leggett *et al*, 1996). The effect is

disproportionally strong in males, especially decreasing the frequency of  $\alpha$ -homokaryotypes (Butlin and Day, 1984a), possibly indicating lower viability of males of this karyotype. However, inversion frequencies also form a cline from the North Sea to the Baltic Sea, with the  $\alpha$  inversion becoming more rare towards the Baltic Sea (Day *et al*, 1983).

Here we explore if the environment modulates inversion frequencies and phenotypic effects in *C. frigida*. For this, we study *C. frigida* populations in Scandinavia that show variation in karyotype frequencies (Day *et al*, 1983). Specifically, we test the possible effects of the  $\alpha/\beta$  inversion polymorphism on body traits and development time across four suitable natural breeding substrates using a fully balanced reciprocal transplant experiment. We also elucidate the relative fitness of the inversion karyotypes on these varying substrates by examining the frequencies of the three karyotypes in different environments.

## Materials and methods

### Study species and sites

*Coelopa frigida* belongs to the group of acalyptrate flies which exclusively forage on decomposing seaweed (Cullen *et al*, 1987) and is found all along the seashores of Scandinavia (Mcalpine, 1991). This species plays a vital role in coastal environment health by accelerating the decomposition of algae, allowing for faster release of nutrients (Cullen *et al*, 1987), and are an important food source for predatory coastal invertebrates and seabirds (Fuller, 2003; Summers

*et al*, 1990). *Coelopa frigida* has 5 chromosomes with inversions occurring on 3 of them (Aziz, 1975). The largest of these is the  $\alpha/\beta$  which occurs on chromosome I. The  $\alpha/\beta$  inversion occurs at stable frequencies in all populations so far studied in Northern Europe (Butlin *et al*, 1982a), although there may be seasonal (Butlin, 1983) and clinal variation (Day *et al*, 1983).

Inversion frequencies of *C. frigida* form a cline from the North Sea to the Baltic Sea, with the  $\alpha$  inversion becoming more rare towards the Baltic Sea (Day *et al*, 1983). Such clines are classic signs of selection and this cline is associated with a decrease in salinity and tidal range and associated changes in the composition of the wrackbed (i.e. the species of algae present). As salinity decreases from the North Sea to the Skagerrak and Kattegat regions (Figure 1) there is a corresponding decrease of marine species of brown seaweeds such as *Fucus* spp. and *Laminaria* spp. moving into the Baltic Sea, *Zostera* eelgrass and red algae gradually displace the brown seaweeds. We selected four populations (Kämpinge, Kåseberga, Mölle and Steninge) from the southern part of the cline that differ in tidal range, salinity, and wrackbed composition (Figure 1, Table 1).

## **Reciprocal transplant experiment**

We conducted a fully balanced reciprocal transplant experiment involving all four locations, where each fly location was allowed to grow on its own wrackbed substrate and the substrates of the remaining three locations. For each location, fly larvae and wrackbed substrate were collected between February and May 2014. The wrackbed substrate was placed in labelled plastic bags and then

frozen to ensure that no viable eggs or larvae remained. Fly larvae from were reared on 150g of their own substrate in aerated plastic containers until a puparium was formed, and then kept in individual Eppendorf tubes (to ensure virginity) containing a small piece of cotton soaked in 5% sucrose solution. When a fly eclosed, the Eppendorf was moved to the fridge to slow down development time. Over a maximum of ten days, adult flies were collected until a minimum of 25 couples could be set up per location. Eggs were collected from 14-15 mating pairs per population and subsequently mixed to populate three replicates of each population x substrate combination with 30 eggs each (4 populations x 4 substrates x 3 replicates, each one with 30 eggs, total eggs for the experiment: 1440). Replicate pots were kept at 25° C with a 12/12 hour light:dark cycle and each pot (190x110x70 mm) was aerated and contained 150 g of representative seaweed. Pots were checked daily and all eclosing flies were sexed and then stored at -20° C on the same day.

### **Morphological measurements**

Morphological measurements were carried out on adult flies only. All flies were weighed (Sartorius Quintix 124-1S microbalance) to the nearest 0.0001 grams. The thorax width of each fly was measured with a digital calliper (Cocraft Digital Vernier Caliper) at the widest place and to the nearest 0.01 mm. This measurement was repeated twice and the average was used. Then, the left wing and right middle leg were removed (if one side was damaged the other side was used). The wing and leg were placed under a thin glass slide and placed under the microscope and a picture was the taken using a Nikon Digital Sight DS-Fi2

mounted on a Nikon SM2800 microscope set to a magnification of two power.  
The resulting image was labelled with an individual identifier. Measurements  
were conducted blind to location and substrate type to avoid bias.

# **Molecular determination of inversion types**

In *C. frigida* the two most common alcohol dehydrogenase (Adh) allozymes, Adh-B and Adh-D are in complete linkage disequilibrium with the  $\alpha$  and  $\beta$  forms of the inversion (Day *et al*, 1982a). Gel electrophoresis was used to visualise the alcohol-dehydrogenase allozymes associated with the two inversion types and this allowed for straightforward genotyping of the inversion types. Starch gels (12%) were prepared by combining 24.5 g potato starch (Sigma-Aldrich, S4251) with 90 ml TEB-buffer, which was then shaken in a 500 ml Buchner flask until dissolved. Heated water (90 ml dH<sub>2</sub>O) was added to the Buchner flask, and shaken until homogenized. The Buchner flask was then heated in the microwave at intervals of 5-10 seconds, and shaken in between to evenly distribute the heat. The heating continued until the mixture was boiling, after which the flask was closed with a rubber plug and de-gassed using a tap-based vacuum pump until the mixture was without visible air bubbles. It was poured onto an 18.5x10 cm glass plate with a plastic frame and left to set for 30 minutes, after which it was left in a 4°C refrigerator overnight.

Fly samples were taken from storage in -20° C freezer and kept on ice during sample preparation. Porcelain plates with 12 wells were placed on ice packs. On each well, a fly was placed together with a small amount of carborundum powder

(Fisher Chemical, #C192-500) and one drop of cold dH<sub>2</sub>O. The flies were then homogenized using a glass rod. Once homogenized, 3x4 mm filter paper wicks were placed in the wells to soak up the homogenate. The wicks were then placed in the starch gel.

Starch gels were put in the electrophoresis chamber, which was connected to a power supply (Consort E863). The two chambers of the electrophoresis machine were filled with TEB-buffer. Two cloth wicks were soaked in TEB-buffer and placed so that they touched evenly along each of the exposed sides of the gel, while still connected to the buffer. An ice pack was placed on top of the gel and the electrophoresis (350 V, 50mA) took 1.5 hours.

After electrophoresis, the gel was cut horizontally with a metal thread and only the bottom half was used for staining. The agar overlay used for staining consisted of 20 ml of 2% agar, 10 ml HCl-Tris buffer(pH 8.6), 6 ml propan-2-ol, 1.5 ml 3-(4,5-dimethylthiazolyl-2)-2,5- diphenyltetrazolium bromide (MTT), 1 ml Phenazine methosulphate (PMS), and 10 ml Nicotinamide-adenine dinucleotide (NAD). The stain was mixed and poured onto the cut surface of the gel. The covered box with the gel was then carefully put in a dark heating cabinet at 37° C for 40 minutes, or until the banding pattern was clear and then photographed.

### **Statistical analysis**

We analyzed weight and development time (in days) in R (R Development Core Team, 2015) using general linear models. Weight was highly correlated with all other morphological characters (Supplemental table S1) so we only analyzed

weight data and development time in a statistical framework. Weight data was normally distributed and so was analyzed using a Gaussian distribution. Development time is essentially count data and right skewed, so we analyzed the data using a Poisson distribution. For both data sets we considered individual flies to be our unit of replication and used the lme4 package in R (Bates *et al*, 2014) to construct a model with all factors (population, substrate, sex, and karyotype) and all two and three way interactions. We also included pot (replicate) nested within population\*substrate as a random factor. We ran the 'Anova' function in the R package car (Fox and Weisberg, 2011) on the full models and then examined the F-values for each term. Starting with a model with only an intercept we built up a series of nested models adding a single main effect, two or three way interaction at a time by decreasing F-value (i.e. starting with the term with the highest F-value). We then used the 'Anova' function with the  $\chi^2$  distribution to compare the models in a nested fashion (i.e. each model is only compared to the one above it) and used a  $\chi^2$  test to determine if they were significantly different. We selected the model with the lowest AIC whose nested models were not significantly better.

To get an overview of our results we also visualized the morphological measurements with a Principal Components Analysis (PCA). The PCA was run on the four highly correlated morphological traits: weight, thorax width, leg and wing length using the 'prcomp' function in R (R Development Core Team, 2015). Visual inspection of our morphological data indicated that males were more variable than females. We formally tested for differences in variability in a

statistical framework using Krishnamoorthy and Lee's (2014) modified signed-likelihood ratio test (MS-LRT) implemented in the R package cvequality (Marwick and Krishnamoorthy, 2016). We used a Bonferroni correction to account for multiple testing (Bland and Altman, 1995).

We further examined the relative proportions of the three karyotypes ( $\alpha\alpha$ ,  $\alpha\beta$ , and  $\beta\beta$ ) in all population x substrate combinations. For these analyses we used pot as our unit of replication. We tested for differences in two ways. First, we tested for karyotype differences using a  $\chi^2$  test on a 3 karyotypes x 16 population-substrate combination matrix. Second, we used a Dirichlet regression model in the R package DirichletReg (Maier, 2014). The Dirichlet regression model allows us to analyze karyotypes (variables with a bounded interval that sum up to a constant - in our case frequencies of karyotypes in a population) exhibiting skewness and heteroscedasticity, without having to transform the data (Maier, 2014). We used a nested approach starting with a simple model and then adding factors. Models were tested against the one above them in a nested fashion using the 'Anova' function in the R package car (Fox and Weisberg, 2011) to determine the best model.

## Results

### Phenotypic data

We had different sample sizes for different treatment combinations (see figure legends for Figures 3 and 4) due to differential survival of the three karyotype categories. Three of the 96 combinations had zero flies (ex:  $\alpha\alpha$  Kämpinge

267 females in Kämpinge) but we do not expect that this unduly influenced our results  
 268 as we did not investigate any 4 way interactions in any of our statistical models  
 269 and thus did not examine these three combinations directly. All morphological  
 270 characteristics were highly and significantly correlated with each other  
 271 (Supplementary Table S1). To get an overall view of the variation in  
 272 morphological traits we conducted a PCA using all four morphological variables  
 273 (wing length, leg length, thorax width, and weight). The first principal component  
 274 explained 93.5% of the variance and the second principal component explained  
 275 6.5% of the variance (Figure 2).

276 We only examined weight, as this morphological trait is a good proxy of the other  
 277 morphological measurements (Pearson correlation coefficients with other traits  
 278 varied from 0.78-0.89, Supplemental Table S1) while still being an easily  
 279 tractable and understandable measurement. Weight was not strongly correlated  
 280 with development time (Pearson's product-moment correlation: 0.10) and  
 281 therefore development time was examined separately. F-values from the full  
 282 models indicated that effect sizes were much larger for weight than development  
 283 time (Table S2). The best model for weight included all main effects, the two-way  
 284 interactions: sex\*karyotype, population\*sex, population\*karyotype,  
 285 population\*substrate, substrate\*karyotype, and the three-way interaction:  
 286 location\*sex\*karyotype. Comparing the best model with the next most simplified  
 287 model gave a  $\chi^2$  value of 43.3 ( $P = 0.00073$ ). The best model for development  
 288 time included the main effects and the two-way interaction karyotype\*sex.  
 289 Comparing the best model with the next most simplified model gave a  $\chi^2$  value of

290 8.6 ( $P = 0.0135$ ). The best models for both weight and development time  
 291 included all main effects and a subset of interactions (Table 2). However, a GxE  
 292 interaction (as evidenced by a population x substrate interaction) was only  
 293 present for morphological characteristics, but not for development time.

294 For all measured traits, the Krishnamoorthy and Lee's (2014) modified signed-  
 295 likelihood ratio test showed that males had significantly more phenotypic  
 296 variation than females (Table 3). This variation could be partially accounted for  
 297 by karyotype. Previous work has shown that males are on average bigger than  
 298 females and that within male size differences are primarily driven by the  $\alpha\beta$   
 299 inversion system:  $\alpha\alpha$  males are the biggest followed by  $\alpha\beta$  and  $\beta\beta$  (Butlin *et al*,  
 300 1982c). This held true in our male data set for all morphological traits (Figure 2)  
 301 but the magnitude of these differences depended on both population and  
 302 substrate type (Figure 3, Supplementary Figures 2-5). Although the relative sizes  
 303 and size differences of the karyotypes differed between combinations of location  
 304 and substrate, the pattern of both leg length and wing length, thorax width, and  
 305 weight (Figure 3, Supplementary Figures 2-5) in relation to karyotype and sex  
 306 was clear and consistent for males, but much less pronounced for females. For  
 307 example, while the morphological PCA groups of the different male karyotypes  
 308 formed distinct yet overlapping clusters, a clustering of female karyotypes was  
 309 absent (Figure 2). Likewise, across treatments (combination of population and  
 310 substrate),  $\alpha\alpha$ -males had the largest mean size, followed by  $\alpha\beta$ -males and  $\beta\beta$ -  
 311 males in all different population x substrate combinations (Figure 3). For females,

less than half of the combinations of population and substrate followed the same pattern.

Development time did not follow the same pattern as observed for morphology (Figure 4). While  $\alpha\alpha$ -males generally took longer to develop, this was not always the case for every combination of population and substrate. For example,  $\beta\beta$  flies from Steninge, raised on Kämpinge substrate took longer to develop than any other flies from Steninge. For females, MS-LRT demonstrated that there was considerably less variation between karyotypes compared to males and patterns varied substantially between populations and substrates.

### **Inversion types**

With the exception of Steninge, frequencies of the karyotypes rarely matched Hardy-Weinberg expectations based on previously estimated allele frequencies (Figure 5). The frequencies of  $\alpha\alpha$ ,  $\alpha\beta$ , and  $\beta\beta$  were significantly different across the Population x Substrate combinations ( $\chi^2 = 71.5$ ,  $df=30$ ,  $P < 0.0001$ ). Generally  $\alpha\beta$  was the most frequently observed karyotype, but  $\beta\beta$  could be just as frequent or more frequent depending on the substrate. In  $\frac{3}{4}$  of the populations (all except Steninge)  $\beta\beta$  was dominant in at least one substrate and that was usually the substrate from Mölle.

We used Dirichlet regression to see which parameters best predicted the karyotype frequencies. With this model we were not able to examine F-values so we compared all possible models with the 'Anova' function from the R package car (Fox and Weisberg, 2011). The best model was population + substrate +

population\*substrate. Comparing this with the next most simplified model gave a  $\chi^2$  value of 73.99 ( $P = 0.0002$ ).

## Discussion

Our results demonstrate that the environment modulates both the frequencies of the karyotypes as well as their phenotypic effects in *C. frigida*. The presence of a significant GxE term for both of these indicates that there is population specific variation in larval fitness of the different inversion types as well as in the phenotypic effects of the inversion. The same pool of eggs was used to seed every substrate treatment per population so the neutral expectation (without sampling bias) would be similar karyotype frequencies across substrates. Instead, we found strong differences in karyotype frequencies between substrates with some trends being consistent across multiple populations (Figure 5). While it is possible that these results are due simply to sampling bias, it is unlikely that sampling bias would produce consistent trends. Furthermore, this result confirms previous research showing that the substrate composition has a strong selective effect on the inversion (Butlin *et al*, 1982b; Day *et al*, 1983; Edward and Gilburn, 2013). It is likely that population specific variation has accumulated in the inversion, as not all trends were consistent across populations. For example,  $\beta\beta$  was the most common karyotype on Mölle wrack for every population except Steninge (Figure 5). Instead, in Steninge, frequencies were often close to Hardy-Weinberg expectations and little variance was seen

355 between substrate combinations compared to other populations, possibly  
356 because heterosis was stronger in Steninge than in the other populations.

357 Our results also indicate that inversion-related size effects in *C. frigida* are  
358 affected by the environment, particularly in males as females show little to no  
359 effect of karyotype on size. Male fly inversion phenotypes from the same  
360 population could vary two-fold for weight when grown on the same substrate (e.g.  
361 Steninge population on Mölle substrate), and three-fold when comparing male  
362 inversion phenotypes across all four growing substrates (e.g. Steninge, Figure 3).

363 Male size has a high heritability with virtually all the variance in size being  
364 attributable to the chromosomal inversion system (Wilcockson *et al*, 1995). In all  
365 of our treatment combinations, environmental effects never swamped the effect  
366 of the inversion. Male  $\alpha\alpha$  were always the biggest, followed by  $\alpha\beta$  and  $\beta\beta$ , which  
367 is consistent with previous work (e.g. Butlin *et al*, 1982a). Population and  
368 substrate changed the magnitude of these differences as well as size averages  
369 but never the pattern of the inversion size effects on males. In contrast to the  
370 strong environment and inversion effects on male size, the inversion exhibited  
371 negligible size effects in females. Specifically, our data show much lower  
372 between inversion variation in size and considerably less variation across  
373 environments for females. A similar difference in effect size between males and  
374 females has also been found in a common garden study on *C. frigida* grown on  
375 artificially mixed substrates containing in excess either the seaweed genus  
376 *Laminaria* or *Fucus* (Edward and Gilburn, 2013). The study by Edward and  
377 Gilburn (2013) also found that flies grown on an excess of *Laminaria* showed

greater among inversion size differences compared to *Fucus*, suggesting that the type of seaweed itself, or the associated microbiome of the seaweed, causes phenotypic differences in size. The wrackbed composition differs markedly along the populations studied, as a consequence of the declining salinity from the North Sea to the Baltic Sea (see Figure 1 and 2 in Wellenreuther *et al*, 2017), and have likely been major selective environmental factors in modulating *C. frigida* populations. Development time, another trait known to be affected by inversion type, also showed significantly higher variation across male karyotypes, but exhibited less extreme environmentally induced effects compared to size, and consequently no significant GxE effects. These results together with previous studies (Butlin and Day, 1984a; Day *et al*, 1980) underscore that the inversion related phenotype effects in *C. frigida* are significantly affected by sex, with male phenotypes being more labile compared to female phenotypes.

Interactions between genotypes and the environment are commonly observed in quantitative traits (Gupta and Lewontin, 1982), particularly those associated with fitness (e.g. Fanara *et al*, 2006), and are thought to provide a potent force for maintaining genetic variation (Fernández Iriarte and Hasson, 2000; Gillespie and Turelli, 1989; Hedrick, 1986). The habitat used by *C. frigida* is heterogeneous and the resulting local population structure is similar to Levene's migration model of subdivided populations, namely by a single pool of individuals that mate at random and breed on discrete and ephemeral resources. Environmental fluctuations in seaweed substrate composition likely favors the persistence of alternative rearrangements (i.e. the  $\alpha/\beta$  inversion) containing sets of co-adapted

alleles via balancing selection (Carroll *et al*, 2001; Filchak *et al*, 2000; Weinig, 2000), with each set being optimal under different conditions (Dobzhansky, 1970). This hypothesis may account for the so called “supergene” idea (Schwander *et al*, 2014) such as those determining mating types found in heterostylous plants and wing mimicry polymorphisms found in *Heliconius* butterflies (Thompson and Jiggins, 2014). Balancing selection resulting from seasonal and stochastic temporal and spatial wrackbed changes may thus be a significant contributor to maintaining the fitness related inversion variation in size. Other examples for selection on fitness trade-offs come from introduced apple *Malus pumila* and native hawthorn *Crataegus* spp. hosts which has led to divergence in phenology and thermal physiology in the true fruit fly *Rhagoletis pomonella* (Filchak *et al*, 2000).

Balancing selection has also been implicated in the maintenance of other inversion polymorphisms, but whether balancing selection can maintain genetic polymorphisms over long time scales is still debated (Bernatchez, 2016). Theoretical studies indicate that balancing selection may primarily be a short-term process because the genetic load that it creates then has a negative feedback that hinders the long-term maintenance of adaptive alleles (Fijarczyk and Babik, 2015). Furthermore, rapid environmental changes may cause dramatic allele frequency shifts that could cause the loss of formerly stable polymorphisms (Fijarczyk and Babik, 2015). Despite this, recent studies have provided some evidence that balancing selection can operate even over longer time scales. Lindtke *et al*. (2017) investigated the inversion related cryptic colour

polymorphism in *Timema cristinae* walking stick insects using a comprehensive dataset of natural populations and population genetic analyses. They were able to demonstrate that inversion colour variation has likely been maintained over extended time periods by balancing selection, which has previously been thought to be only possible over short time frames.

In conclusion, our results indicate that the inversion in *C. frigida* likely evolves via a combination of local mutations, GxE effects, and differential fitness of karyotypes in heterogeneous environments. Future work should apply high-resolution genome-wide approaches that target the regions inside the inversion to identify the true genic targets of balancing varying selection. This approach would also elucidate which genes inside the inversion are linked to these large size effects in males, and how the environment has shape the differentiation between these genes along gradients.

## Acknowledgements

MW would like to thank Roger Butlin and Andre Gilburn for helpful advice regarding the molecular inversion determination and rearing techniques. EB would like to thank Fabian Roger for helpful advice regarding the figures. Helena Westerdahl and Jan Åke Nilsson gave some helpful comments on earlier versions of this work. The work was supported by a grant from the Crafoord Foundation, from Entomological Foundation in Lund and from the Swedish Research Vetenskapsrådet Council (2012-3996) to MW. EB was supported by a

446 Marie Skłodowska-Curie fellowship 704920 — ADAPTIVE INVERSIONS —  
 447 H2020-MSCA-IF-2015.

448

## 449 **Conflict of Interest**

450 The authors declare that they have no conflict of interest.

451

## 452 **Data Archiving**

453 All raw phenotypic data and karyotype frequencies will be deposited on Dryad  
 454 upon acceptance.

455

456

457

458

459

460

461

462

463

# References

- Aziz JB (1975). *Investigations into chromosomes 1, 2 and 3 of Coelopa frigida (Fab.)*. Thesis.
- Bates D, Mächler M, Bolker B, Walker S (2014). Fitting linear mixed-effects models using lme4. *arXiv preprint arXiv:1406.5823*.
- Bernatchez L (2016). On the maintenance of genetic variation and adaptation to environmental change: considerations from population genomics in fishes. *J Fish Biol* **89**(6): 2519-2556.
- Bland JM, Altman DG (1995). Multiple significance tests: the Bonferroni method. *Bmj* **310**(6973): 170.
- Butlin RK (1983). The maintenance of an inversion polymorphism in *Coelopa frigida*. University of Nottingham.
- Butlin RK, Collins P, Skevington S, Day T (1982a). Genetic variation at the alcohol dehydrogenase locus in natural populations of the seaweed fly, *Coelopa frigida*. *Heredity* **48**(1): 45-55.
- Butlin RK, Collins PM, Skevington SJ, Day TH (1982b). Genetic-Variation at the Alcohol-Dehydrogenase Locus in Natural-Populations of the Seaweed Fly, *Coelopa-Frigida*. *Heredity* **48**(Feb): 45-55.
- Butlin RK, Day TH (1984a). The effect of larval competition on development time and adult size in the seaweed fly, *Coelopa frigida*. *Oecologia* **63**(1): 122-127.
- Butlin RK, Day TH (1984b). The Effect of Larval Competition on Development Time and Adult Size in the Seaweed Fly, *Coelopa-Frigida*. *Oecologia* **63**(1): 122-127.
- Butlin RK, Day TH (1989). Environmental correlates of inversion frequencies in natural populations of seaweed flies (*Coelopa frigida*). *Heredity* **62**(2): 223-232.

- Butlin RK, Read IL, Day TH (1982c). The effects of a chromosomal inversion on adult size and male mating success in the seaweed fly, *Coelopa frigida*. *Heredity* **49**(1): 51-62.
- Carreira VP, Soto IM, Hasson E, Fanara JJ (2006). Patterns of variation in wing morphology in the cactophilic *Drosophila buzzatii* and its sibling *D. koepferae*. *J Evol Biol* **19**(4): 1275-1282.
- Carroll SP, Dingle H, Famula TR, Fox CW (2001). Genetic architecture of adaptive differentiation in evolving host races of the soapberry bug, *Jadera haematoloma*. *Genetica* **112**(1): 257-272.
- Collins PM. (1978). The Genetical Society of Great Britain.
- Cullen SJ, Young AM, Day TH (1987). Dietary requirements of seaweed flies (*Coelopa frigida*). *Estuarine, Coastal and Shelf Science* **24**(5): 701-710.
- Day T, Dobson T, Hillier P, Parkin D, Clarke B (1982a). Associations of enzymic and chromosomal polymorphisms in the seaweed fly, *Coelopa frigida*. *Heredity* **48**(Pt 1): 35-44.
- Day TH, Buckley PA (1980). Alcohol dehydrogenase polymorphism in the seaweed fly, *Coelopa frigida*. *Biochemical Genetics* **18**(7-8): 727-742.
- Day TH, Dawe C, Dobson T, Hillier PC (1983). A chromosomal inversion polymorphism in Scandinavian populations of the seaweed fly, *Coelopa frigida*. *Hereditas* **99**(1): 135-145.
- Day TH, Dobson T, Hillier PC, Parkin DT, Clarke B (1982b). Associations of enzymic and chromosomal polymorphisms in the seaweed fly, *Coelopa frigida*. *Heredity* **48**(1): 35-44.
- Day TH, Dobson T, Hillier PC, Parkin DTa, Clarke B (1980). Different rates of development associated with the alcohol dehydrogenase locus in the seaweed fly, *Coelopa frigida*. *Heredity* **44**: 321-326.

535 Dobzhansky T (1948). Genetics of natural populations. XVI. Altitudinal and  
536 seasonal changes produced by natural selection in certain populations of  
537 *Drosophila pseudoobscura* and *Drosophila persimilis*. *Genetics* **33**(2): 158.  
538  
539 Dobzhansky TG (1970). *Genetics of the evolutionary process*. Columbia  
540 University Press: New York.  
541  
542 Edward DA, Gilburn AS (2013). Male-specific genotype by environment  
543 interactions influence viability selection acting on a sexually selected inversion  
544 system in the seaweed fly, *Coelopa frigida*. *Evolution* **67**(1): 295-302.  
545  
546 Endler JA (1977). *Geographic variation, speciation, and clines*. Princeton  
547 University Press.  
548  
549 Falconer D (1990). Selection in different environments: effects on environmental  
550 sensitivity (reaction norm) and on mean performance. *Genetics research* **56**(1):  
551 57-70.  
552  
553 Fanara J, Folguera G, Iriarte PF, Mensch J, Hasson E (2006). Genotype by  
554 environment interactions in viability and developmental time in populations of  
555 cactophilic *Drosophila*. *JEB* **19**(3): 900-908.  
556  
557 Fernández Iriarte P, Hasson E (2000). The role of the use of different host plants  
558 in the maintenance of the inversion polymorphism in the cactophilic *Drosophila*  
559 *buzzatii*. *Evolution* **54**(4): 1295-1302.  
560  
561 Fijarczyk A, Babik W (2015). Detecting balancing selection in genomes: limits  
562 and prospects. *Molecular Ecology* **24**(14): 3529-3545.  
563  
564 Filchak KE, Roethele JB, Feder JL (2000). Natural selection and sympatric  
565 divergence in the apple maggot *Rhagoletis pomonella*. *Nature* **407**(6805): 739-  
566 742.  
567  
568 Fox J, Weisberg S (2011). *An R Companion to Applied Regression*, 2 edn. SAGE  
569 Publications: Thousand Oaks, California.  
570  
571 Fuller RA (2003). Factors influencing foraging decisions in ruddy turnstones  
572 *Arenaria interpres* (L.). Durham University.

573

574 Gilburn AS, Day TH (1994). Sexual dimorphism, sexual selection and the  $\alpha$   $\beta$   
575 chromosomal inversion polymorphism in the seaweed fly, *Coelopa frigida*.  
576 *Proceeding of the Royal Society of Biological Sciences* **257**(1350): 303-309.

577

578 Gilburn AS, Foster SP, Day TH (1992). Female mating preference for large size  
579 in *Coelopa frigida* (seaweed fly). *Heredity* **69**(3): 209-216.

580

581 Gillespie JH, Turelli M (1989). Genotype-environment interactions and the  
582 maintenance of polygenic variation. *Genetics* **121**(1): 129-138.

583

584 Gupta AP, Lewontin R (1982). A study of reaction norms in natural populations of  
585 *Drosophila pseudoobscura*. *Evolution* **36**(5): 934-948.

586

587 Hedrick PW (1986). Genetic polymorphism in heterogeneous environments: a  
588 decade later. *Annual review of ecology and systematics* **17**(1): 535-566.

589

590 Hoekstra HE, Coyne JA (2007). The locus of evolution: evo devo and the  
591 genetics of adaptation. *Evolution* **61**(5): 995-1016.

592

593 Hoffmann AA, Rieseberg LH (2008). Revisiting the impact of inversions in  
594 evolution: from population genetic markers to drivers of adaptive shifts and  
595 speciation? *Annu Rev Ecol Evol Syst* **39**(1): 21-42.

596

597 Kirkpatrick M (2010). How and why chromosome inversions evolve. *PLoS Biol*  
598 **8**(9): e1000501.

599

600 Kirkpatrick M, Barton N (2006). Chromosome inversions, local adaptation and  
601 speciation. *Genetics* **173**(1): 419-434.

602

603 Krishnamoorthy K, Lee M (2014). Improved tests for the equality of normal  
604 coefficients of variation. *Computational Statistics* **29**(1-2): 215-232.

605

606 Leggett M, Wilcockson R, Day T, Phillips D, Arthur W (1996). The genetic effects  
607 of competition in seaweed flies. *Biol J Linn Soc* **57**(1): 1-11.

608

- Lindtke D, Lucek K, Soria-Carrasco V, Villoutreix R, Farkas TE, Riesch R *et al* (2017). Long-term balancing selection on chromosomal variants associated with crypsis in a stick insect. *Mol Ecol* **26**: xxx-xxx.
- Lynch M, Walsh B (1998). *Genetics and analysis of quantitative traits*, Vol 1. Sinauer Sunderland, MA.
- Maier MJ (2014). DirichletReg: Dirichlet regression for compositional data in R. *Research Report Series / Department of Statistics and Mathematics WU Vienna University of Economics and Business*: 125.
- Marwick B, Krishnamoorthy K. (2016).
- Mcalpine DK (1991). Review of the Australian Kelp Flies (Diptera, Coelopidae). *Syst Entomol* **16**(1): 29-84.
- R Development Core Team R (2015). *R: A language and environment for statistical computing*, Vol 1. R Foundation for Statistical Computing.
- Reinhardt JA, Kolaczowski B, Jones CD, Begun DJ, Kern AD (2014). Parallel geographic variation in *Drosophila melanogaster*. *Genetics* **197**(1): 361-373.
- Savolainen O, Lascoux M, Merila J (2013). Ecological genomics of local adaptation. *Nature Review Genetics* **14**(11): 807-820.
- Schrider DR, Hahn MW, Begun DJ (2016). Parallel evolution of copy-number variation across continents in *Drosophila melanogaster*. *Mol Biol Evo* **33**(5): 1308-1316.
- Schwander T, Libbrecht R, Keller L (2014). Supergenes and complex phenotypes. *Current Biology* **24**(7): 288-294.
- Storz JF (2002). Contrasting patterns of divergence in quantitative traits and neutral DNA markers: analysis of clinal variation. *Mol Ecol* **11**: 2537-2551.

Sturtevant AH (1921). A case of rearrangement of genes in *Drosophila*.  
*Proceedings of The National Academy of Science of the United States of America*  
**7**: 235–237.

Summers RW, Smith S, Nicoll M, Atkinson NK (1990). Tidal and Sexual  
Differences in the Diet of Purple Sandpipers *Calidris-Maritima* in Scotland. *Bird*  
*Study* **37**: 187-194.

Thompson M, Jiggins C (2014). Supergenes and their role in evolution. *Heredity*  
**113**(1): 1-8.

Tigano A, Friesen VL (2016). Genomics of local adaptation with gene flow. *Mol*  
*Ecol.*

Ungerer MC, Halldorsdottir SS, Purugganan MD, Mackay TF (2003). Genotype-  
environment interactions at quantitative trait loci affecting inflorescence  
development in *Arabidopsis thaliana*. *Genetics* **165**(1): 353-365.

Via S, Lande S (1985). Genotype–environment interaction and the evolution of  
phenotypic plasticity. *Evolution* **39**: 505-522.

Weinig C (2000). Plasticity versus canalization: population differences in the  
timing of shade-avoidance responses. *Evolution* **54**(2): 441-451.

Wellenreuther M, Hansson B (2016). Detecting polygenic evolution: problems,  
pitfalls, and promises. *Trends Genet* **32**(3): 155–164.

Wellenreuther M, Rosenquist H, Jaksons P, Larson W (2017). Local adaptation  
along an environmental cline in a species with an inversion polymorphism. *JEB*.

Wilcockson R, Crean C, Day T (1995). Heritability of a Sexually Selected  
Character Expressed in Both Sexes. *Nature* **374**(6518): 158-159.

Yeaman S (2013). Genomic rearrangements and the evolution of clusters of  
locally adaptive loci. *PNAS*.

## Tables

Table 1. Spatial coordinates (WGS 1984 DD), sea surface salinity (PSU), inversion frequency, and wrackbed composition of the study sites.

|           | Coordinates (WGS84, DD) |           | Sea surface salinity (PSU) <sup>a</sup> |           | Inversion frequency <sup>b</sup>    | Wrackbed composition         |                              |                                   |                                  |
|-----------|-------------------------|-----------|-----------------------------------------|-----------|-------------------------------------|------------------------------|------------------------------|-----------------------------------|----------------------------------|
|           | Latitude                | Longitude | Mean annual                             | Annual SD | Frequency of the $\alpha$ inversion | Percentage <i>Fucus</i> spp. | Percentage Kelp <sup>c</sup> | Percentage red algae <sup>d</sup> | Percentage eelgrass <sup>e</sup> |
| Steninge  | 56.77                   | 12.63     | 15.79                                   | 16.62     | 0.49                                | 50                           | 20                           | 30                                | 0                                |
| Mölle     | 56.28                   | 12.49     | 15.38                                   | 16.88     | 0.42                                | 30                           | 30                           | 30                                | 10                               |
| Kämpinge  | 55.4                    | 12.98     | 12.82                                   | 11.74     | 0.35                                | 30                           | 0                            | 30                                | 40                               |
| Kåseberga | 55.38                   | 14.06     | 9.91                                    | 5.4       | 0.34                                | 30                           | 0                            | 50                                | 20                               |

<sup>a</sup> Data source: Sbrocco & Barber (2013), accessed on 1 November 2016.

<sup>b</sup> Day et al. (1983).

<sup>c</sup> *Saccharina* and *Laminaria* spp.

<sup>d</sup> *Furcellaria lumbricalis*

<sup>e</sup> *Zostera marina*

Table 2. Best models for adult weight and development time. An X indicates that a main effect or interaction was present in the best model.

|                  | Main Effects |            |     |           | 2-way interactions   |               |                     |                |                      |               | 3-way interactions             |
|------------------|--------------|------------|-----|-----------|----------------------|---------------|---------------------|----------------|----------------------|---------------|--------------------------------|
|                  | Karyotype    | Population | Sex | Substrate | Karyotype:Population | Karyotype:Sex | Karyotype:Substrate | Population:Sex | Population:Substrate | Sex:Substrate | Karyotype:Population:Substrate |
| Weight           | x            | x          | x   | x         | x                    | x             | x                   | x              | x                    |               | x                              |
| Development Time | x            | x          | x   | x         |                      | x             |                     |                |                      |               |                                |

Table 3. Results from Krishnamoorthy and Lee's (2014) modified signed-likelihood ratio test (MS-LRT) looking to see if the coefficient of variation is different between males and females. Bolded p-values are significant at the  $P < 0.0001$  level after a Bonferroni correction.

| Trait            | MS-LRT Statistic | P-value         |
|------------------|------------------|-----------------|
| Weight           | 79.22            | <b>0</b>        |
| Thorax Width     | 83.79            | <b>0</b>        |
| Leg Length       | 61.64            | <b>4.11E-15</b> |
| Wing Length      | 118.05           | <b>0</b>        |
| Development Time | 22.09            | <b>2.61E-06</b> |

## Titles and legends to figures

Figure 1: Map of *C. frigida* fly populations used in this study. Base map from d-maps ([http://d-maps.com/carte.php?num\\_car=23102](http://d-maps.com/carte.php?num_car=23102)).

Figure 2: Principal Components Analysis (PCA) of four morphological measurements (thorax width, weight, wing length and middle leg tibia length) of adult flies from the reciprocal transplant experiment. Only the first two PCs are shown. Flies are categorized by sex (males-squares, females-circles) and karyotype (black -  $\alpha\alpha$ , grey -  $\alpha\beta$ , and white- $\beta\beta$ ).

Figure 3: Boxplot of weight across populations (listed at Top), substrate (listed on x-axis), sex (indicated by top (male) and bottom (female) charts), and karyotype (indicated by color, black -  $\alpha\alpha$ , grey -  $\alpha\beta$ , and white- $\beta\beta$ ). Outliers are not shown for clarity. N for each population x sex combination (from left to right for each karyotype and substrate as listed in the figure): Kämpinge Male: 1, 9, 4, 3, 20, 15, 3, 13, 19, 1, 21, 6, Kåseberga Male: 2, 11, 6, 10, 19, 5, 5, 9, 10, 2, 9, 6, Mölle Male: 1, 6, 8, 10, 14, 13, 6, 12, 13, 2, 6, 10, Steninge Male: 0, 3, 2, 7, 17, 7, 5, 15, 5, 7, 16, 14, Kämpinge Female: 0, 5, 4, 1, 12, 11, 0, 13, 18, 3, 17, 9, Kåseberga Female: 2, 3, 6, 7, 24, 11, 4, 12, 18, 5, 13, 5, Mölle Female: 4, 10, 4, 4, 9, 4, 6, 6, 5, 4, 3, 8, Steninge Female: 2, 5, 4, 8, 21, 8, 8, 19, 6, 7, 21, 7.

Figure 4: Boxplot of development time across populations (listed at Top), substrate (listed on x-axis), sex (indicated by top (male) and bottom (female) charts), and karyotype (indicated by color, black -  $\alpha\alpha$ , grey -  $\alpha\beta$ , and white- $\beta\beta$ ). Outliers are not shown for clarity. N for each population x sex combination (from left to right for each karyotype and substrate as listed in the figure): Kämpinge Male: 1, 9, 4, 3, 20, 15, 3, 13, 19, 1, 21, 6, Kåseberga Male: 2, 11, 6, 10, 19, 5, 5, 9, 10, 2, 9, 6, Mölle Male: 1, 6, 8, 10, 14, 13, 6, 12, 13, 2, 6, 10, Steninge Male: 0, 3, 2, 7, 17, 7, 5, 15, 5, 7, 16, 14, Kämpinge Female: 0, 5, 4, 1, 12, 11, 0, 13, 18, 3, 17, 9, Kåseberga Female: 2, 3, 6, 7, 24, 11, 4, 12, 18, 5, 13, 5, Mölle Female: 4, 10, 4, 4, 9, 4, 6, 6, 5, 4, 3, 8, Steninge Female: 2, 5, 4, 8, 21, 8, 8, 19, 6, 7, 21, 7.

Figure 5: Box plot of frequencies of different karyotypes (black -  $\alpha\alpha$ , grey -  $\alpha\beta$ , and white- $\beta\beta$ ) across populations (listed at the top of each graph) and substrates (listed on the x-axis). Dashed lines indicate HWE expectations (solid -  $\alpha\alpha$ , dashed -  $\alpha\beta$ , and dotted- $\beta\beta$ ) based on Day et al (1983) data.

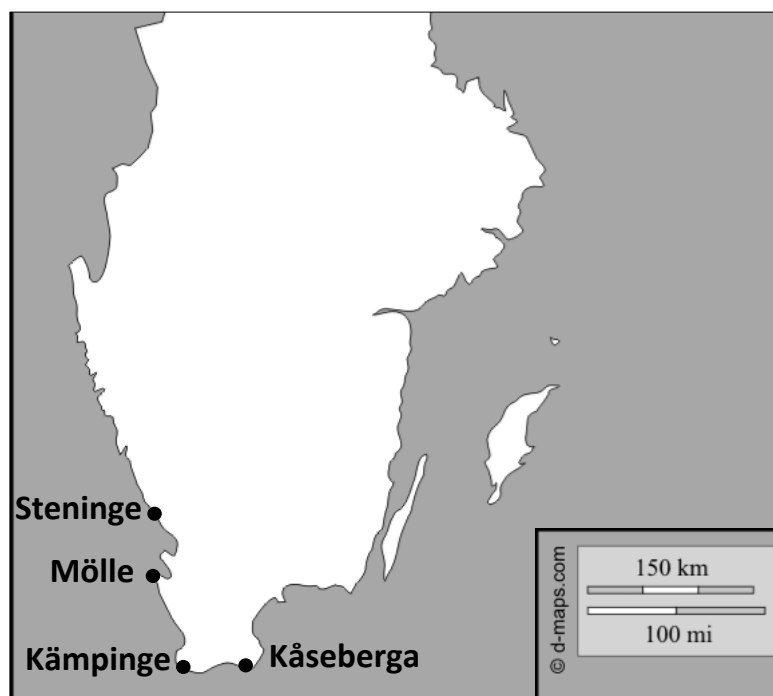

**Figure 1**

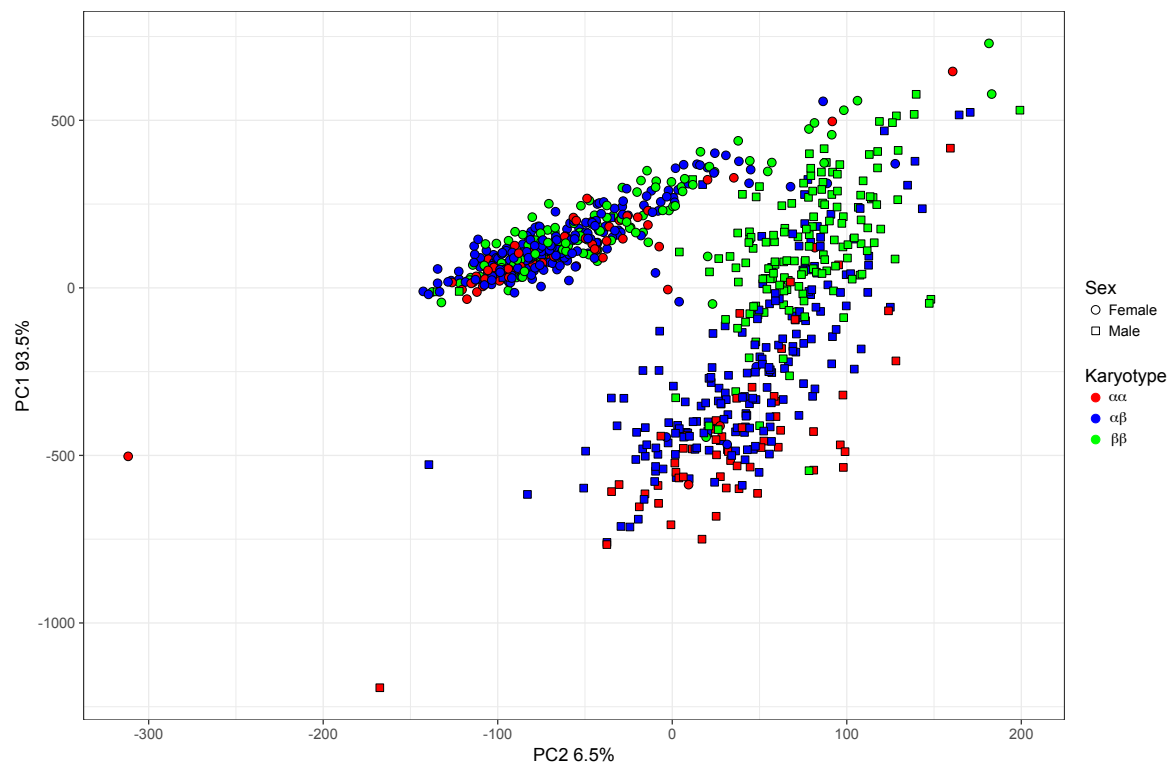

**Figure 2**

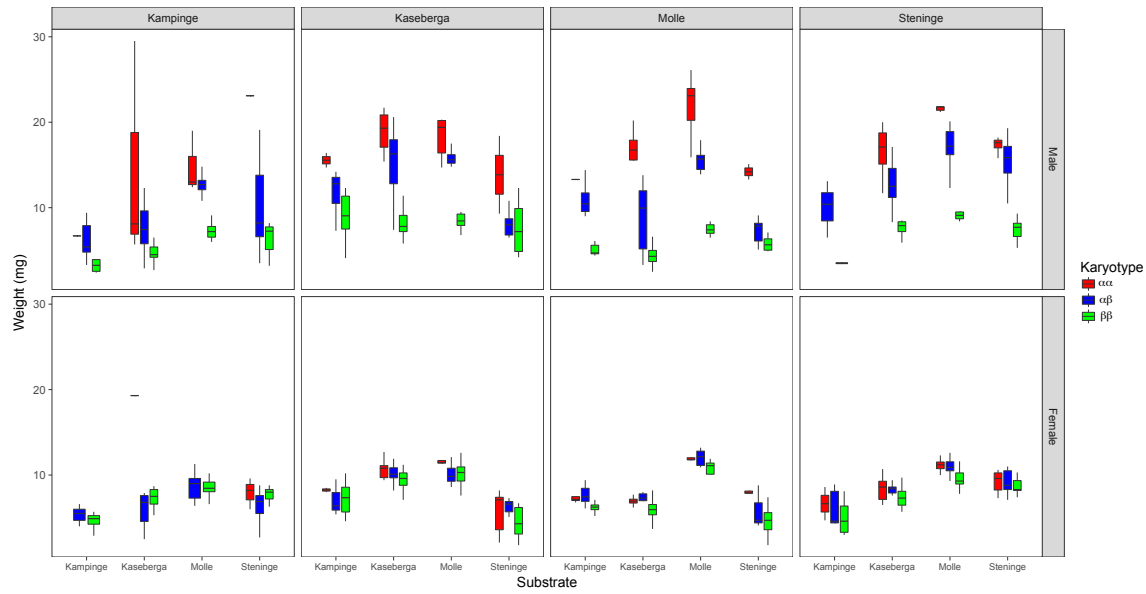

**Figure 3**

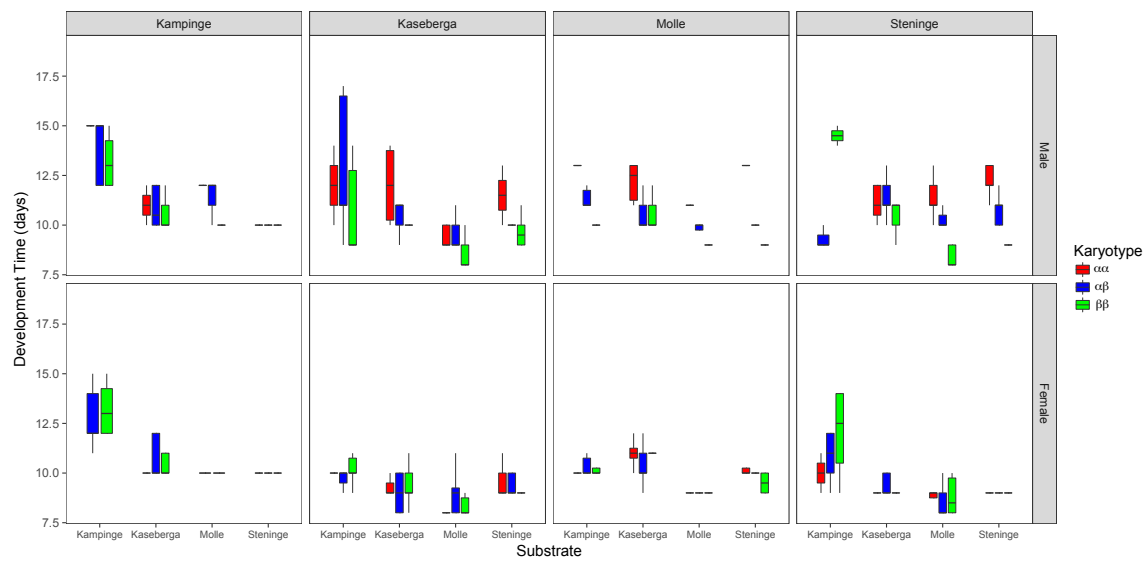

**Figure 4**

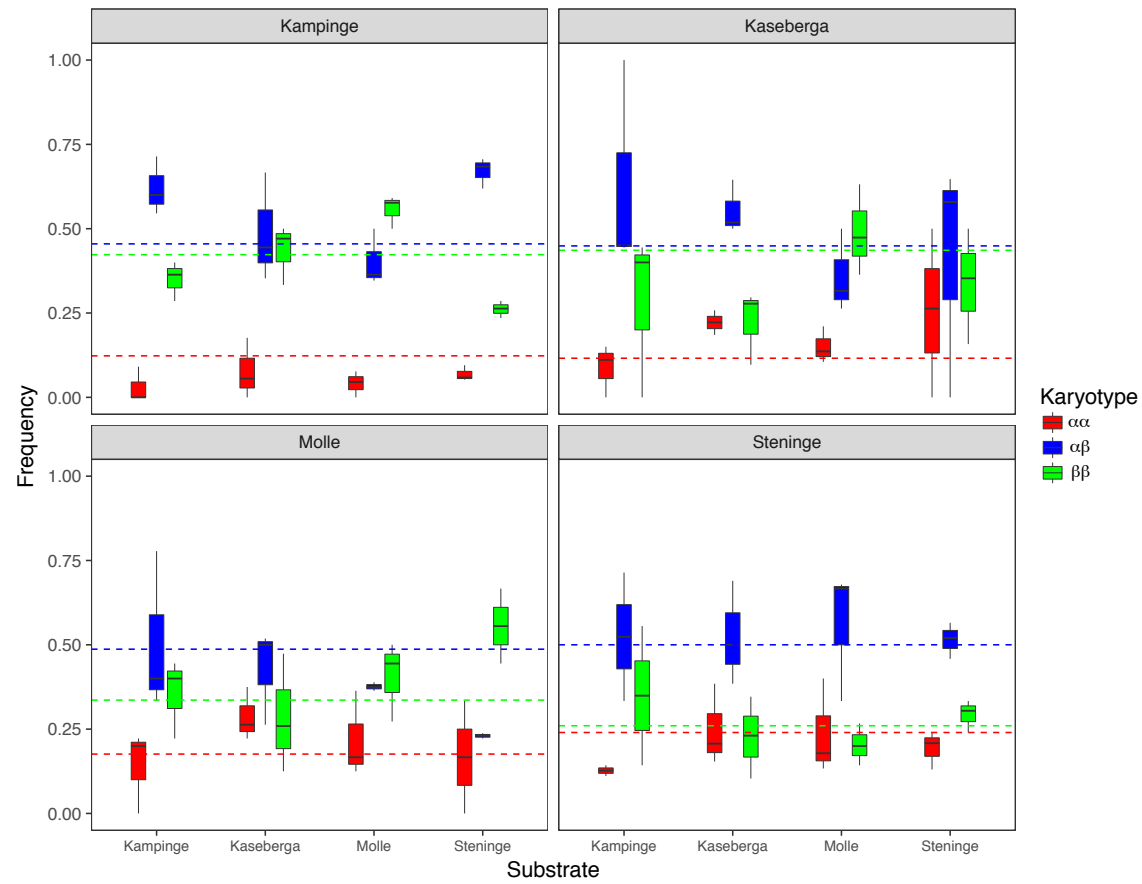

**Figure 5**

## Supplemental Material

Table S1. Pearson correlations of morphological factors.

|              | Adult Weight | Thorax Width | Wing Length | Leg Length |
|--------------|--------------|--------------|-------------|------------|
| Weight       | 1            | 0.8306678    | 0.8850752   | 0.7786367  |
| Thorax Width | 0.8306678    | 1            | 0.8452453   | 0.7628986  |
| Wing length  | 0.8850752    | 0.8452453    | 1           | 0.865498   |
| Leg Length   | 0.7786367    | 0.7628986    | 0.865498    | 1          |

Table S2. ANOVA tables for the full models adult weight (A) and development time (B). Bolded terms are included in the final models.

A.

| Term                           | DF | Sum of Squares | Mean Square | F-Value  |
|--------------------------------|----|----------------|-------------|----------|
| Population                     | 3  | 201.08         | 67.03       | 13.6683  |
| Substrate                      | 3  | 327.74         | 109.25      | 22.2781  |
| Sex                            | 1  | 1559.27        | 1559.27     | 317.9702 |
| Karyotype                      | 2  | 2589.74        | 1294.87     | 264.0532 |
| Population:Substrate           | 9  | 185.65         | 20.63       | 4.2065   |
| Population:Sex                 | 3  | 422.75         | 140.92      | 28.7363  |
| Population:Karyotype           | 6  | 228.57         | 38.09       | 7.7683   |
| Substrate:Sex                  | 3  | 18.59          | 6.2         | 1.264    |
| Substrate:Karyotype            | 6  | 116.87         | 19.48       | 3.9719   |
| Sex:Karyotype                  | 2  | 1406.79        | 703.4       | 143.4383 |
| Population:Substrate:Sex       | 9  | 64.31          | 7.15        | 1.4572   |
| Population:Substrate:Karyotype | 18 | 220.67         | 12.26       | 2.5      |
| Population:Sex:Karyotype       | 6  | 36.49          | 6.08        | 1.2401   |
| Substrate:Sex:Karyotype        | 6  | 53.67          | 8.95        | 1.8242   |

B.

| Term                           | DF | Sum of Squares | Mean Square | F-Value |
|--------------------------------|----|----------------|-------------|---------|
| Population                     | 3  | 11.039         | 3.6796      | 3.6796  |
| Substrate                      | 3  | 35.277         | 11.759      | 11.759  |
| Sex                            | 1  | 20.778         | 20.7776     | 20.7776 |
| Karyotype                      | 2  | 6.958          | 3.4792      | 3.4792  |
| Population:Substrate           | 9  | 9.476          | 1.0528      | 1.0528  |
| Population:Sex                 | 3  | 6.46           | 2.1533      | 2.1533  |
| Population:Karyotype           | 6  | 0.461          | 0.0769      | 0.0769  |
| Substrate:Sex                  | 3  | 0.598          | 0.1994      | 0.1994  |
| Substrate:Karyotype            | 6  | 1.639          | 0.2732      | 0.2732  |
| Sex:Karyotype                  | 2  | 6.725          | 3.3625      | 3.3625  |
| Population:Substrate:Sex       | 9  | 3.591          | 0.399       | 0.399   |
| Population:Substrate:Karyotype | 18 | 4.861          | 0.2701      | 0.2701  |
| Population:Sex:Karyotype       | 6  | 0.263          | 0.0438      | 0.0438  |
| Substrate:Sex:Karyotype        | 6  | 0.534          | 0.0889      | 0.0889  |

Figure S2: Boxplot of thorax width across populations (listed at Top), substrate (listed on x-axis), sex (indicated by top (male) and bottom (female) charts), and karyotype (indicated by color, red -  $\alpha\alpha$ , blue -  $\alpha\beta$ , and green- $\beta\beta$ ). Outliers are not shown for clarity.

Figure S3: Boxplot of leg length across populations (listed at Top), substrate (listed on x-axis), sex (indicated by top (male) and bottom (female) charts), and karyotype (indicated by color, red -  $\alpha\alpha$ , blue -  $\alpha\beta$ , and green- $\beta\beta$ ). Outliers are not shown for clarity.

Figure S4: Boxplot of wing length across populations (listed at Top), substrate (listed on x-axis), sex (indicated by top (male) and bottom (female) charts), and karyotype (indicated by color, red -  $\alpha\alpha$ , blue -  $\alpha\beta$ , and green- $\beta\beta$ ). Outliers are not shown for clarity.

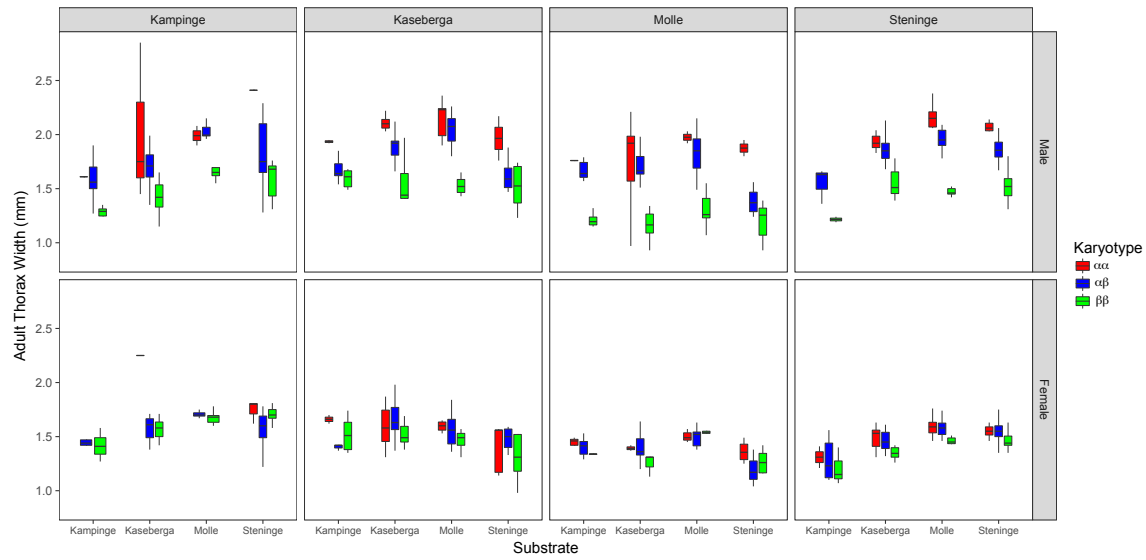

**Figure S2**

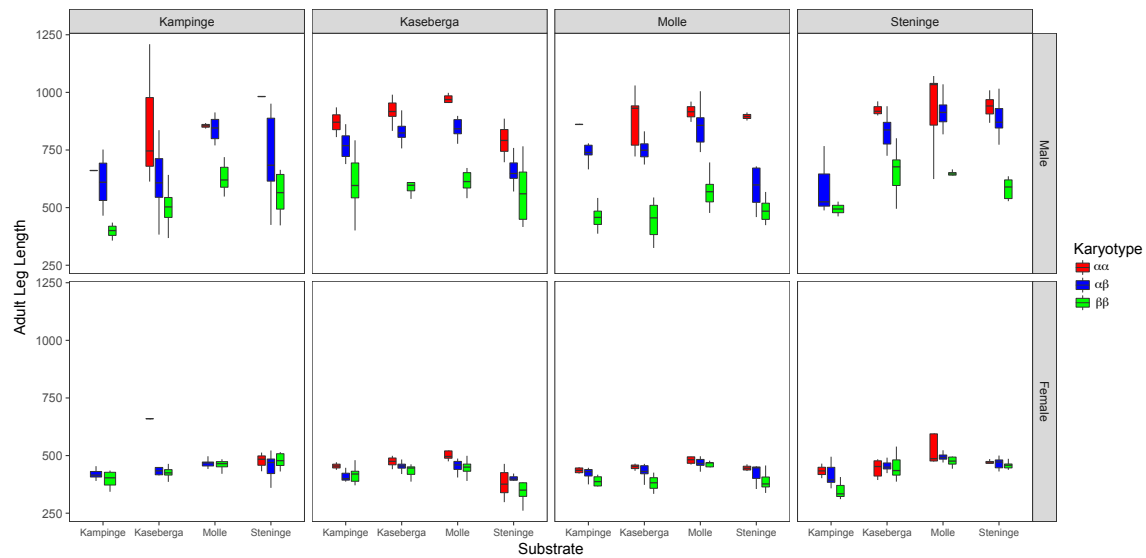

**Figure S3**

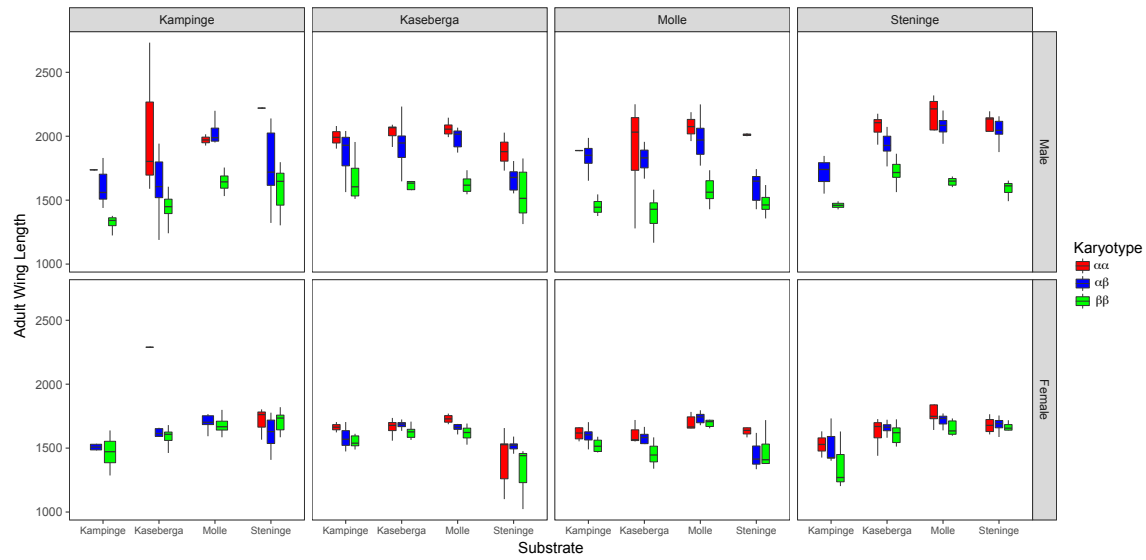

**Figure S4**
